# Supplementary material for: Ni/Ln2Zr2O7 (Ln = La, Pr, Sm and Y) catalysts for methane steam reforming: the effects of A site replacement
Source: Royal Society of Chemistry journal article supplement (doi:10.1039/c7cy00004a), 2017-01-01
Supplement: c7cy00004a1.pdf [file c7cy00004a1.pdf]

## Supporting Information

### Ni/Ln<sub>2</sub>Zr<sub>2</sub>O<sub>7</sub> (Ln=La, Pr, Sm and Y) catalysts for methane steam reforming: on the effects of A site replacement

Xianhua Zhang<sup>†,a</sup> Xiuzhong Fang<sup>†,a</sup> Xiaohui Feng,<sup>a</sup> Xiao Li,<sup>a</sup> Wenming Liu,<sup>a</sup> Xianglan Xu,<sup>a</sup> Ning Zhang,<sup>a</sup> Zhixian Gao,<sup>b</sup> Xiang Wang<sup>a,\*</sup> Wufeng Zhou<sup>c</sup>

E-mail: xwang23@ncu.edu.cn

† These authors contribute equally to this work

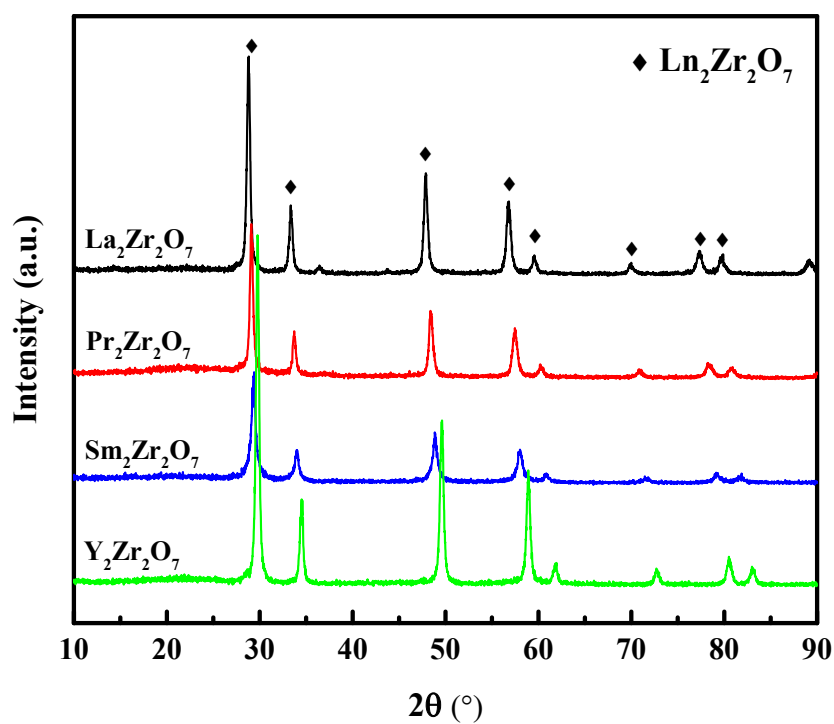

**Fig. S1.** XRD patterns of the Ln<sub>2</sub>Zr<sub>2</sub>O<sub>7</sub> supports before calcination.

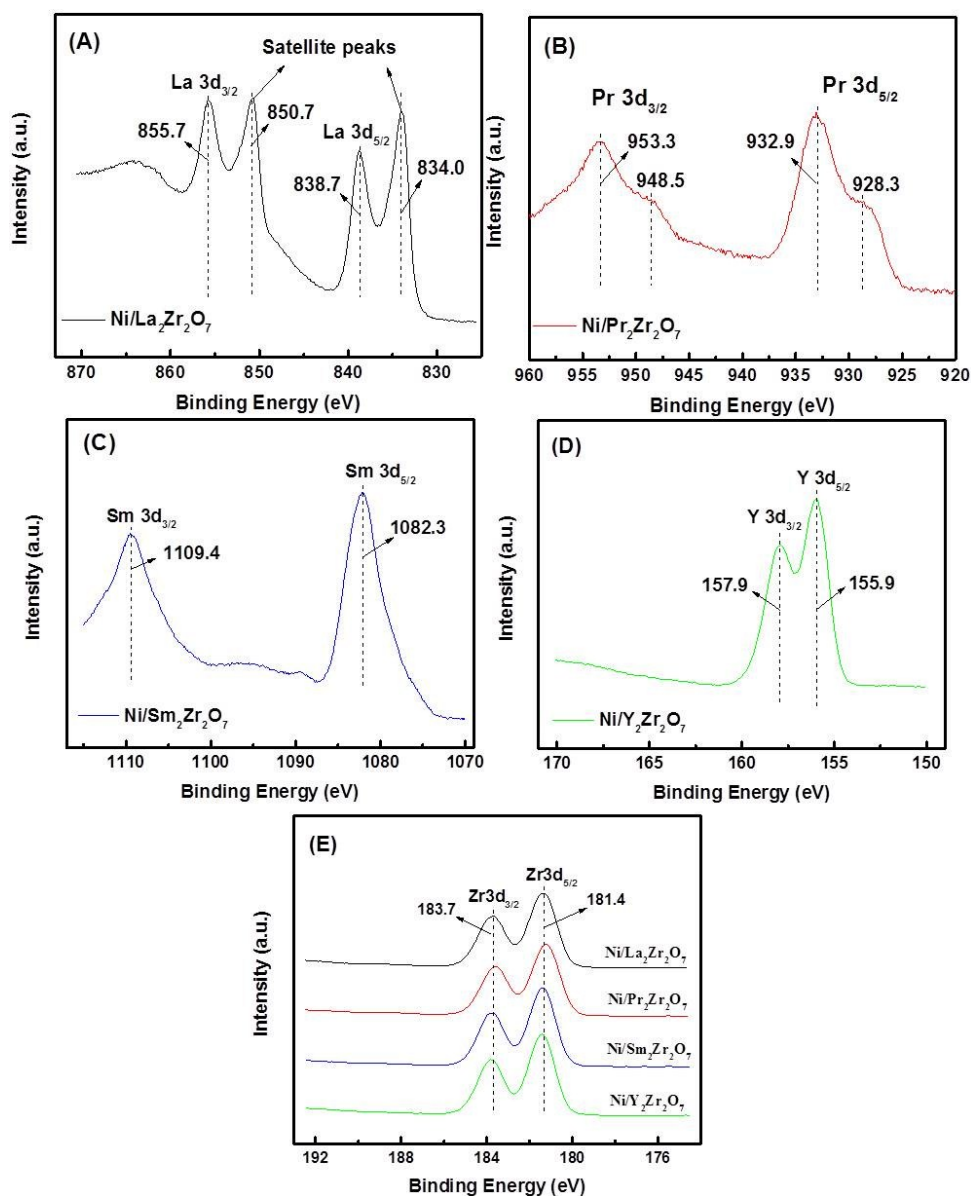

**Fig. S2.** XPS spectra of (A) La 3d, (B) Pr 3d, (C) Sm 3d, (D) Y 3d and (E) Zr 3d for the freshly reduced Ni/Ln<sub>2</sub>Zr<sub>2</sub>O<sub>7</sub> catalysts.

**Table S1.** The structural properties of the Ln<sub>2</sub>Zr<sub>2</sub>O<sub>7</sub> supports

| Catalysts                                      | before calcination                 |                                               | after calcination                  |                                               | after calcination |       |
|------------------------------------------------|------------------------------------|-----------------------------------------------|------------------------------------|-----------------------------------------------|-------------------|-------|
|                                                | crystallite size (nm) <sup>a</sup> | surface area (m <sup>2</sup> /g) <sup>b</sup> | Crystallite size (nm) <sup>a</sup> | surface area (m <sup>2</sup> /g) <sup>b</sup> | hkl               | d (Å) |
| La <sub>2</sub> Zr <sub>2</sub> O <sub>7</sub> | 17.8                               | 13                                            | 18                                 | 14                                            | 222               | 3.11  |
| Pr <sub>2</sub> Zr <sub>2</sub> O <sub>7</sub> | 19.1                               | 13                                            | 18                                 | 13                                            | 222               | 3.08  |
| Sm <sub>2</sub> Zr <sub>2</sub> O <sub>7</sub> | 17.8                               | 17                                            | 12                                 | 17                                            | 222               | 3.05  |
| Y <sub>2</sub> Zr <sub>2</sub> O <sub>7</sub>  | 18.1                               | 17                                            | 17                                 | 18                                            | 222               | —     |

<sup>a</sup> Calculated from XRD results; <sup>b</sup> Determined by BET.
